# Supplementary material for: Dense arrays of cobalt nanorods as rare-earth free permanent magnets
Source: Royal Society of Chemistry journal article supplement (doi:10.1039/c5nr07143g), 2016-01-01
Supplement: c5nr07143g1.pdf [file c5nr07143g1.pdf]

## SUPPORTING INFORMATION

### **Dense arrays of cobalt nanorods as rare-earth free permanent magnets**

*E. Anagnostopoulou,<sup>a</sup> B. Grindi,<sup>a</sup> L.-M. Lacroix,<sup>a</sup> F. Ott,<sup>b</sup> I. Panagiotopoulos,<sup>c</sup> G. Viau<sup>a,\*</sup>*

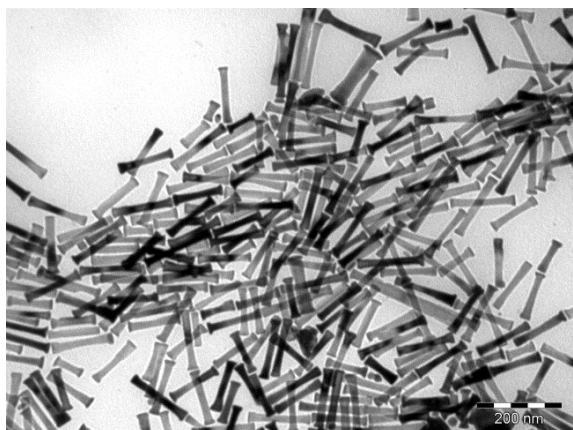

**Sample R<sub>17</sub> ( $d_m = 17.5$  nm,  $L_m = 120$  nm)**

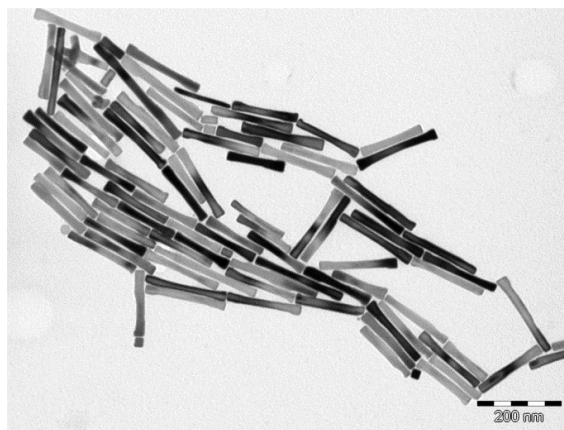

**Sample R<sub>22</sub> ( $d_m = 22$  nm,  $L_m = 166$  nm)**

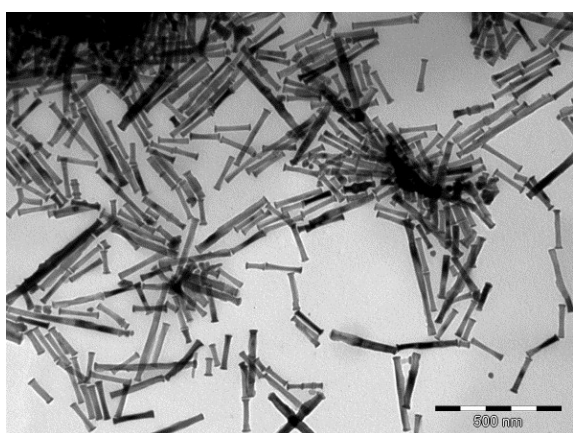

**Sample R<sub>24</sub> ( $d_m = 24$  nm,  $L_m = 190$  nm)**

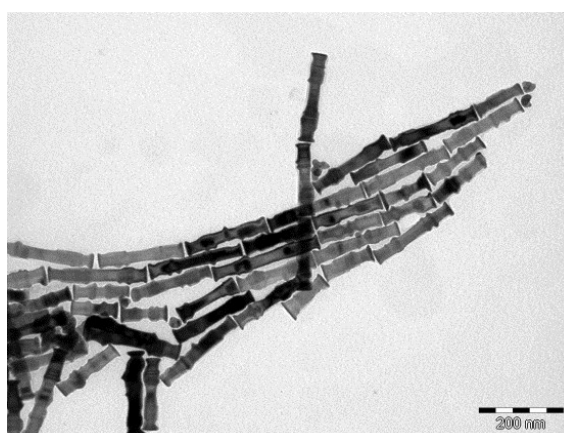

**Sample R<sub>28</sub> ( $d_m = 28$  nm,  $L_m = 190$  nm)**

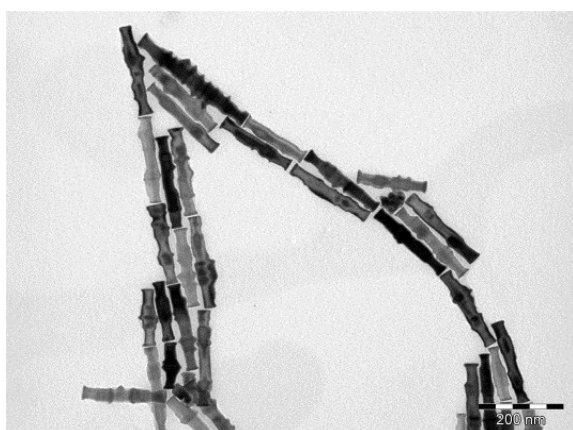

**Sample R<sub>31</sub> ( $d_m = 31$  nm,  $L_m = 190$  nm)**

**Fig. S1** Transmission electron microscopy images of cobalt nanorods prepared by the polyol process, mean diameter,  $d_m$ , mean length,  $L_m$ . Scale bars denote 200 nm.

**Tab. S1** Details on the rod washing prior to their alignment and drying and squareness of the  $M(H)$  loop after alignment.

- A1 and A2 (standard procedure): the rods were washed three times before their dispersion in chloroform and alignment ;
- A3: several additional washings were done;
- A4: alignment of large scale samples, the washing of the rods was lower than the standard procedure.

| Sample             | $d_m/L_m$<br>(nm) | Washing<br>Solvent | Washing<br>procedure | $SQ$ |
|--------------------|-------------------|--------------------|----------------------|------|
| R <sub>17</sub> A1 | 17.5/120          | chloroform         | standard             | 0.86 |
| R <sub>17</sub> A2 | 17.5/120          | toluene            | standard             | 0.75 |
| R <sub>22</sub> A1 | 22/166            | chloroform         | standard             | 0.93 |
| R <sub>22</sub> A2 | 22/166            | toluene            | standard             | 0.79 |
| R <sub>22</sub> A3 | 22/166            | chloroform         | extended             | 0.96 |
| R <sub>24</sub> A2 | 24/190            | toluene            | standard             | 0.74 |
| R <sub>28</sub> A2 | 28/190            | toluene            | standard             | 0.81 |
| R <sub>28</sub> A4 | 28/190            | toluene            | limited              | 0.57 |
| R <sub>31</sub> A4 | 31/190            | toluene            | limited              | 0.69 |

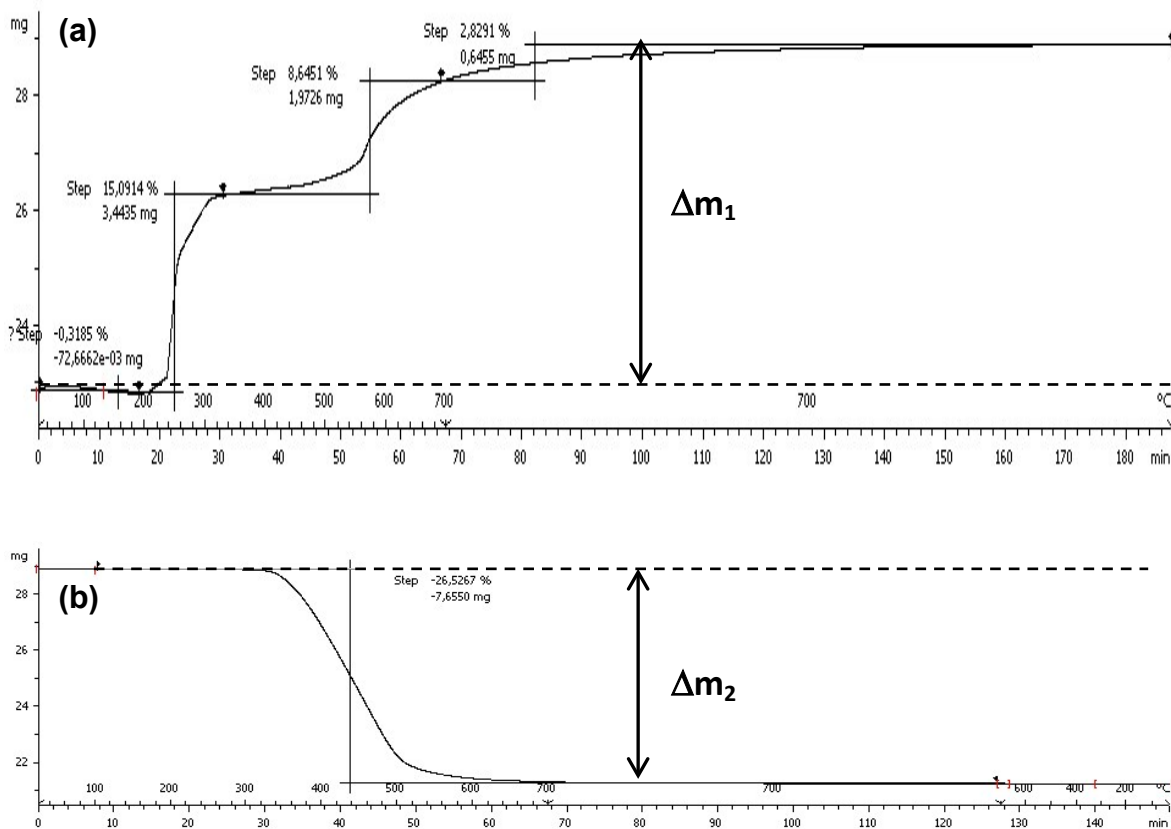

**Fig. S2** Thermogravimetric analysis of  $m_0 = 22.8$  mg of the sample  $R_{31}A4$  (a) oxidation in air up to  $700^\circ\text{C}$  associated with a mass gain  $\Delta m_1 = +5.99$  mg followed by (b) reduction at  $700^\circ\text{C}$  in  $\text{H}_2/\text{Ar} = 4/96$  atmosphere associated with the mass loss  $\Delta m_2 = -7.65$  mg. The cobalt mass fraction in this sample is  $\%w(\text{Co}_{total}) = (m_0 + \Delta m_1 + \Delta m_2)/m_0 = 92.7\%$

*Note that the presence of residual solvent in the needles can be observed in the first TGA measurement where a mass loss is observed at temperatures as low as  $80^\circ\text{C}$  which do not correspond to organic matter calcination but to simple solvent evaporation.*
